# Supplementary material for: Smoking accelerates renal cystic disease and worsens cardiac phenotype in Pkd1-deficient mice
Source: PubMed Central journal article supplement (PMC8280209; doi:10.1038/s41598-021-93633-7), 2021-07-14
Supplement: 41598_2021_93633_MOESM1_ESM.pdf [file 41598_2021_93633_MOESM1_ESM.pdf]

## **Smoking accelerates renal cystic disease and worsens cardiac phenotype in *Pkd1*-deficient mice**

Marciana V. Sousa<sup>1</sup>, Andressa G. Amaral<sup>1</sup>, Jessica A. Freitas<sup>1</sup>, Gilson M. Murata<sup>1</sup>, Elieser H. Watanabe<sup>1</sup>, Bruno E. Balbo<sup>1</sup>, Marcelo D. Tavares<sup>2</sup>, Renato A. Hortegal<sup>2</sup>, Camila Rocon<sup>2</sup>, Leandro E. Souza<sup>2</sup>, Maria C. Irigoyen<sup>2</sup>, Vera M. Salemi<sup>2</sup>, and Luiz F. Onuchic<sup>1,\*</sup>.

<sup>1</sup>Divisions of Nephrology and Molecular Medicine, Department of Medicine, University of São Paulo School of Medicine, São Paulo, Brazil; <sup>2</sup>Heart Institute, University of São Paulo School of Medicine, São Paulo, Brazil.

# Supplementary Figure S1

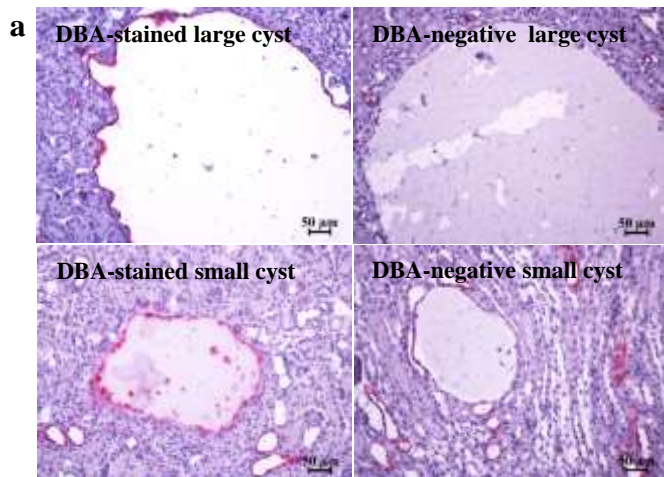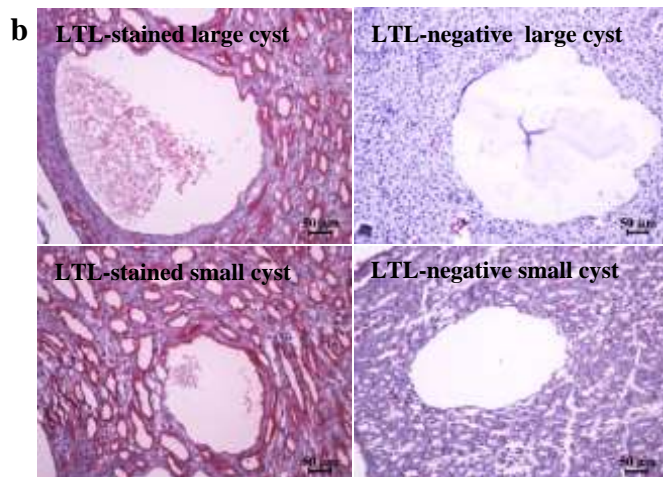

## **SUPPLEMENTARY FIGURE LEGENDS**

**Supplementary Figure S1.** Representative images of DBA-stained and LTL-stained large and small renal cysts, and of corresponding non-stained cysts. Original magnification x200; bar=50 $\mu$ m.
